# Supplementary material
Source: PubMed Central journal article supplement (PMC5787375)

## Supplementary Figure 1- Uncropped scans

Fig. 1a

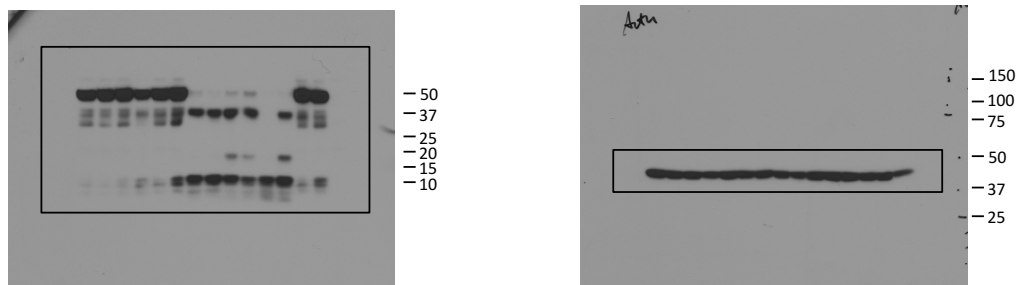

Fig. 4a

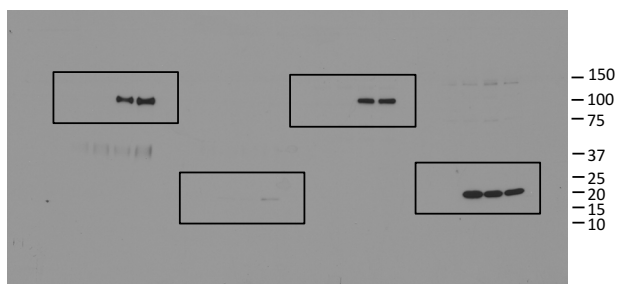

Fig. 4b

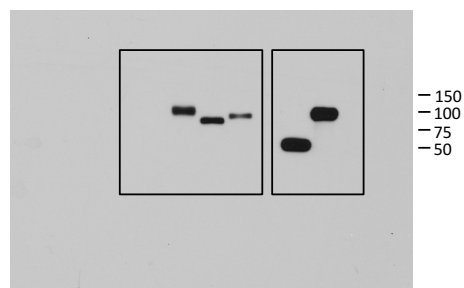

Fig. 4c

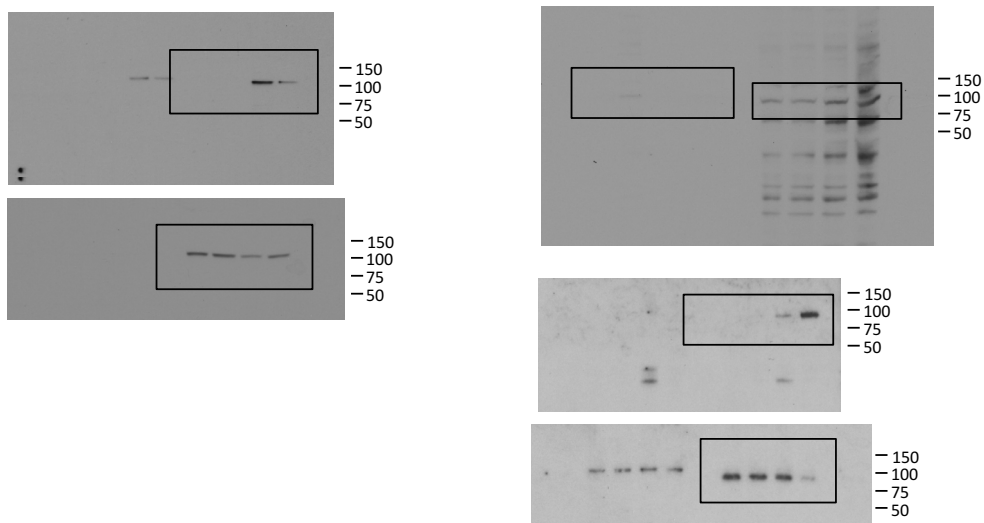

Fig. 4d

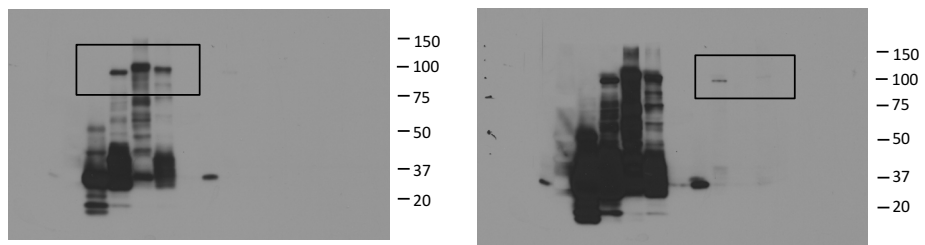

Fig. 4e

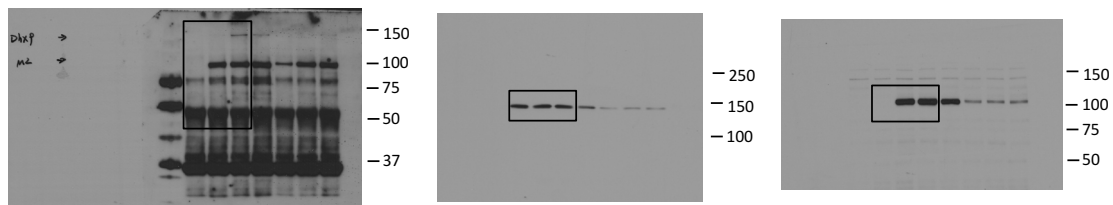

Fig. 4f

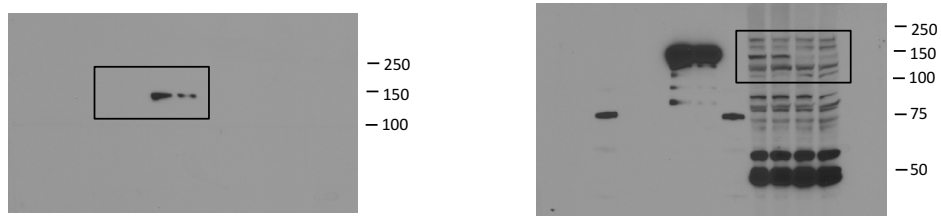

Fig. 4g

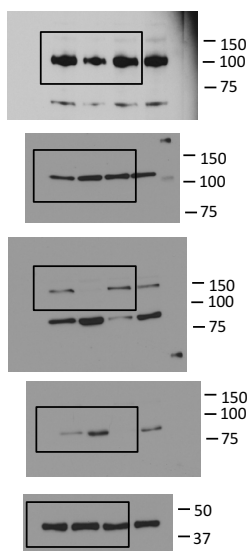

Extended data Fig. 4c

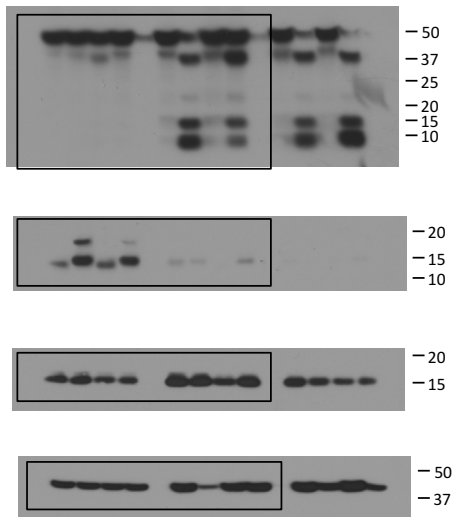

Extended data Fig. 8a

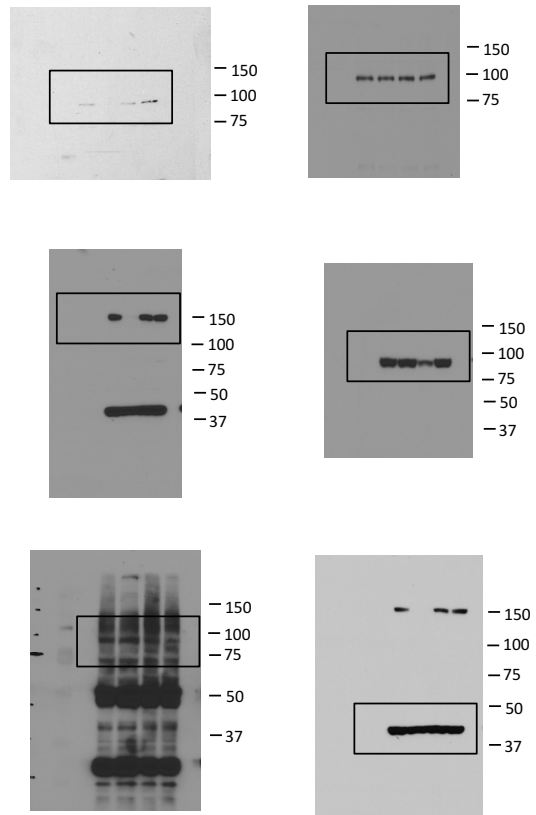

Extended data Fig. 8b

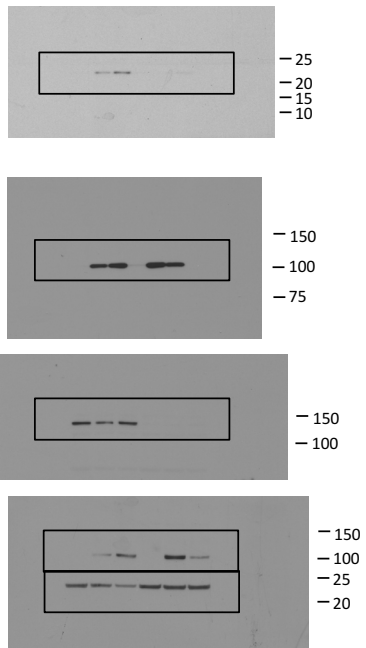

Extended data Fig. 9b

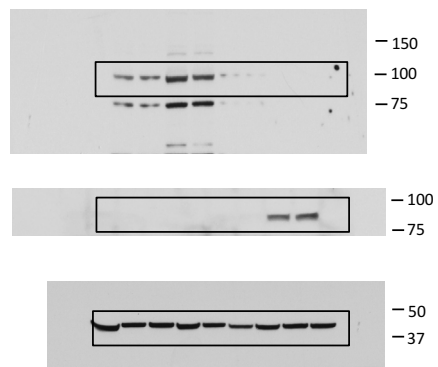

Supplement: NIHMS932104-supplement-Supplemental.pdf [file NIHMS932104-supplement-Supplemental.pdf]
